# Supplementary material for: Identifying and Supporting Students at Risk of Failing the National Medical Licensure Examination in Japan Using a Predictive Pass Rate
Source: Research Square preprint supplement (doi:10.21203/rs.3.rs-34475/v2), 2020-11-02
Supplement: Supplementary file 1 [file 8cbc44fc958b2b3fa9b6c34b.pdf]

### **Additional file 1: Logistic regression formula of PPR in the NMLE**

Forced entry method:  $\log\{p/(1 - p)\} = 7.75849 - 0.13301 \times \text{age at admission} + 1.00772 \times \text{female} + 1.60261 \times \text{neighborhood} - 0.77012 \times \text{type of HS (public)} - 0.03346 \times \text{level of HS} + 0.26591 \times \text{HS GPA} + 0.03069 \times \text{NCTUA score} - 0.02104 \times \text{score in liberal arts} + 0.00456 \times \text{TOEFL score} + 0.03728 \times \text{score in basic sciences in the first year} + 0.09396 \times \text{score in basic biomedical sciences in the second year} - 0.35949 \times \text{score in pre-clinical medical sciences from the third to fourth years} + 0.16101 \times \text{CBT-IRT score} - 0.05099 \times \text{Pre-CC OSCE score} + 1.42424 \times \text{performance in clinical clerkship from the fifth to sixth years} + 1.72797 \times \text{achievement in the graduation examination} + 0.68164 \times \text{with holdover}.$

Stepwise method:  $\log\{p/(1 - p)\} = 11.65386 - 0.15522 \times \text{age at admission} + 1.57629 \times \text{neighborhood} - 0.25435 \times \text{score in pre-clinical medical sciences from the third to fourth years} + 0.16662 \times \text{CBT-IRT score} + 1.4537 \times \text{performance in clinical clerkship from the fifth to sixth years} + 1.70081 \times \text{achievement in the graduation examination}.$
